# Supplementary material
Source: PubMed Central journal article supplement (PMC5531062)
Supplement: NIHMS859132-supplement-Supplemental_Digital_Content_2.pdf [file NIHMS859132-supplement-Supplemental_Digital_Content_2.pdf]

Table, Supplemental Digital Content 2. Overall Statistics for all Free Flap Operations in Chang Gung Memorial Hospital Compared with National Health Insurance Data in 2012

| Source of Data                        | Hospital's<br>Medical Records | National Health<br>Insurance Data |
|---------------------------------------|-------------------------------|-----------------------------------|
| Total number of free flap patients    | 512                           | 505                               |
| Total number of plastic surgeon Sum   | 30                            | 31                                |
| Total number of successful operations | 495                           | 485                               |
| Success rate                          | 96.68%                        | 96.04%                            |
