# Supplementary material
Source: PubMed Central journal article supplement (PMC5531062)
Supplement: NIHMS859132-supplement-Supplemental_Digital_Content_3.pdf [file NIHMS859132-supplement-Supplemental_Digital_Content_3.pdf]

**Table, Supplemental Digital Content 3. List of Complications and codes**

| <b>Taiwan Medical Codes</b> | <b>Description</b>                                 |
|-----------------------------|----------------------------------------------------|
| 69001B                      | Embolectomy, arterial                              |
| 69003B                      | Thrombectomy, venous                               |
| 69005B                      | Exploration vascular                               |
| 48001C – 48006C             | Debridement                                        |
| 69029B                      | Exploration for postoperative hemorrhage           |
| 69008B                      | Anastomosis of blood vessel                        |
| 69032C                      | Repair and anastomosis of peripheral vessel        |
| 62054B                      | Fasciocutaneous rotation flap                      |
| <b>ICD-9-CM* codes</b>      | <b>Description</b>                                 |
| 998.11                      | Intraoperative or postoperative hemorrhage         |
| 998.12                      | Intraoperative or postoperative hematoma           |
| 998.13                      | Noninfected intraoperative or postoperative seroma |
| 998.51                      | Infected intraoperative or postoperative seroma    |
| 998.59                      | Other postoperative infection                      |

\* International Classification of Disease, Ninth Revision, Clinical Modification
