# Supplementary material
Source: PubMed Central journal article supplement (PMC5531062)
Supplement: NIHMS859132-supplement-Supplemental_Digital_Content_4.pdf [file NIHMS859132-supplement-Supplemental_Digital_Content_4.pdf]

**Table, Supplemental Digital Content 4. Generalized Linear Mixed Model for Probability of Complication and 30-day Readmission of Free Flap, 2001-2012 †**

| <b>Outcome</b>                     | <b>Complication</b> |               |                | <b>30-day Readmission</b> |               |                |
|------------------------------------|---------------------|---------------|----------------|---------------------------|---------------|----------------|
| <b>Parameter</b>                   | <b>Odds Ratio</b>   | <b>95% CI</b> | <b>P-value</b> | <b>Odds Ratio</b>         | <b>95% CI</b> | <b>P-value</b> |
| <b>No of patients, 25,327</b>      |                     |               |                |                           |               |                |
| <b>Gender</b>                      |                     |               |                |                           |               |                |
| Female                             | 0.69                | 0.59-0.82     | <.01*          | 0.92                      | 0.83-1.02     | 0.12           |
| Male (ref)                         |                     |               |                |                           |               |                |
| Patient age                        | 0.99                | 0.99-1.00     | 0.75           | 0.99                      | 0.99-1.00     | 0.01*          |
| Elixhauser                         | 1.10                | 1.06-1.14     | <.01*          | 1.20                      | 1.17-1.23     | <.01*          |
| <b>Emergency</b>                   |                     |               |                |                           |               |                |
| Yes                                | 1.02                | 0.76-1.38     | 0.85           | 0.95                      | 0.78-1.18     | 0.68           |
| No (ref)                           |                     |               |                |                           |               |                |
| Surgeon experience (year)          | 0.98                | 0.97-0.99     | <.01*          | 1.01                      | 1.00-1.02     | 0.02*          |
| <b>Surgeon volume group</b>        |                     |               |                |                           |               |                |
| 11-25                              | 0.99                | 0.83-1.17     | 0.90           | 0.98                      | 0.85-1.14     | 0.82           |
| >25                                | 1.05                | 0.81-1.35     | 0.71           | 0.77                      | 0.62-0.98     | 0.03*          |
| ≤ 10 (ref)                         |                     |               |                |                           |               |                |
| <b>Hospital type</b>               |                     |               |                |                           |               |                |
| Public                             | 0.73                | 0.42-1.26     | 0.26           | 0.93                      | 0.73-1.20     | 0.58           |
| Private (ref)                      |                     |               |                |                           |               |                |
| <b>Teaching hospital</b>           |                     |               |                |                           |               |                |
| Yes                                | 1.25                | 0.25-6.24     | 0.79           | 0.64                      | 0.32-1.31     | 0.23           |
| No (ref)                           |                     |               |                |                           |               |                |
| <b>Geographic location</b>         |                     |               |                |                           |               |                |
| Central                            | 1.87                | 1.01-3.44     | 0.05*          | 0.70                      | 0.52-0.94     | 0.02*          |
| Eastern                            | 2.48                | 0.79-7.82     | 0.12           | 0.93                      | 0.54-1.62     | 0.81           |
| Southern                           | 1.65                | 0.93-2.93     | 0.08           | 0.74                      | 0.57-0.96     | 0.02*          |
| Northern (ref)                     |                     |               |                |                           |               |                |
| Average number of beds             | 1.00 <sup>(1)</sup> | 1.00-1.00     | <.01*          | 1.00 <sup>(2)</sup>       | 1.00-1.00     | 0.91           |
| Average number of plastic surgeons | 1.04                | 1.02-1.06     | <.01*          | 0.99                      | 0.98-1.00     | 0.12           |
| <b>Hospital volume group</b>       |                     |               |                |                           |               |                |
| 95-156                             | 0.31                | 0.16-0.61     | 0.01*          | 1.39                      | 1.06-1.84     | 0.02*          |
| >156                               | 0.22                | 0.07-0.65     | 0.01*          | 0.77                      | 0.49-1.24     | 0.29           |
| ≤ 94 (ref)                         |                     |               |                |                           |               |                |

†From Taiwan's National Health Insurance Research Database 2001-2012

\*Significantly at the 95% confidence interval.

<sup>(1)</sup> Odds Ratio= 1.0006; <sup>(2)</sup> Odds Ratio= 0.999
