# Supplementary material
Source: PubMed Central journal article supplement (PMC5531062)

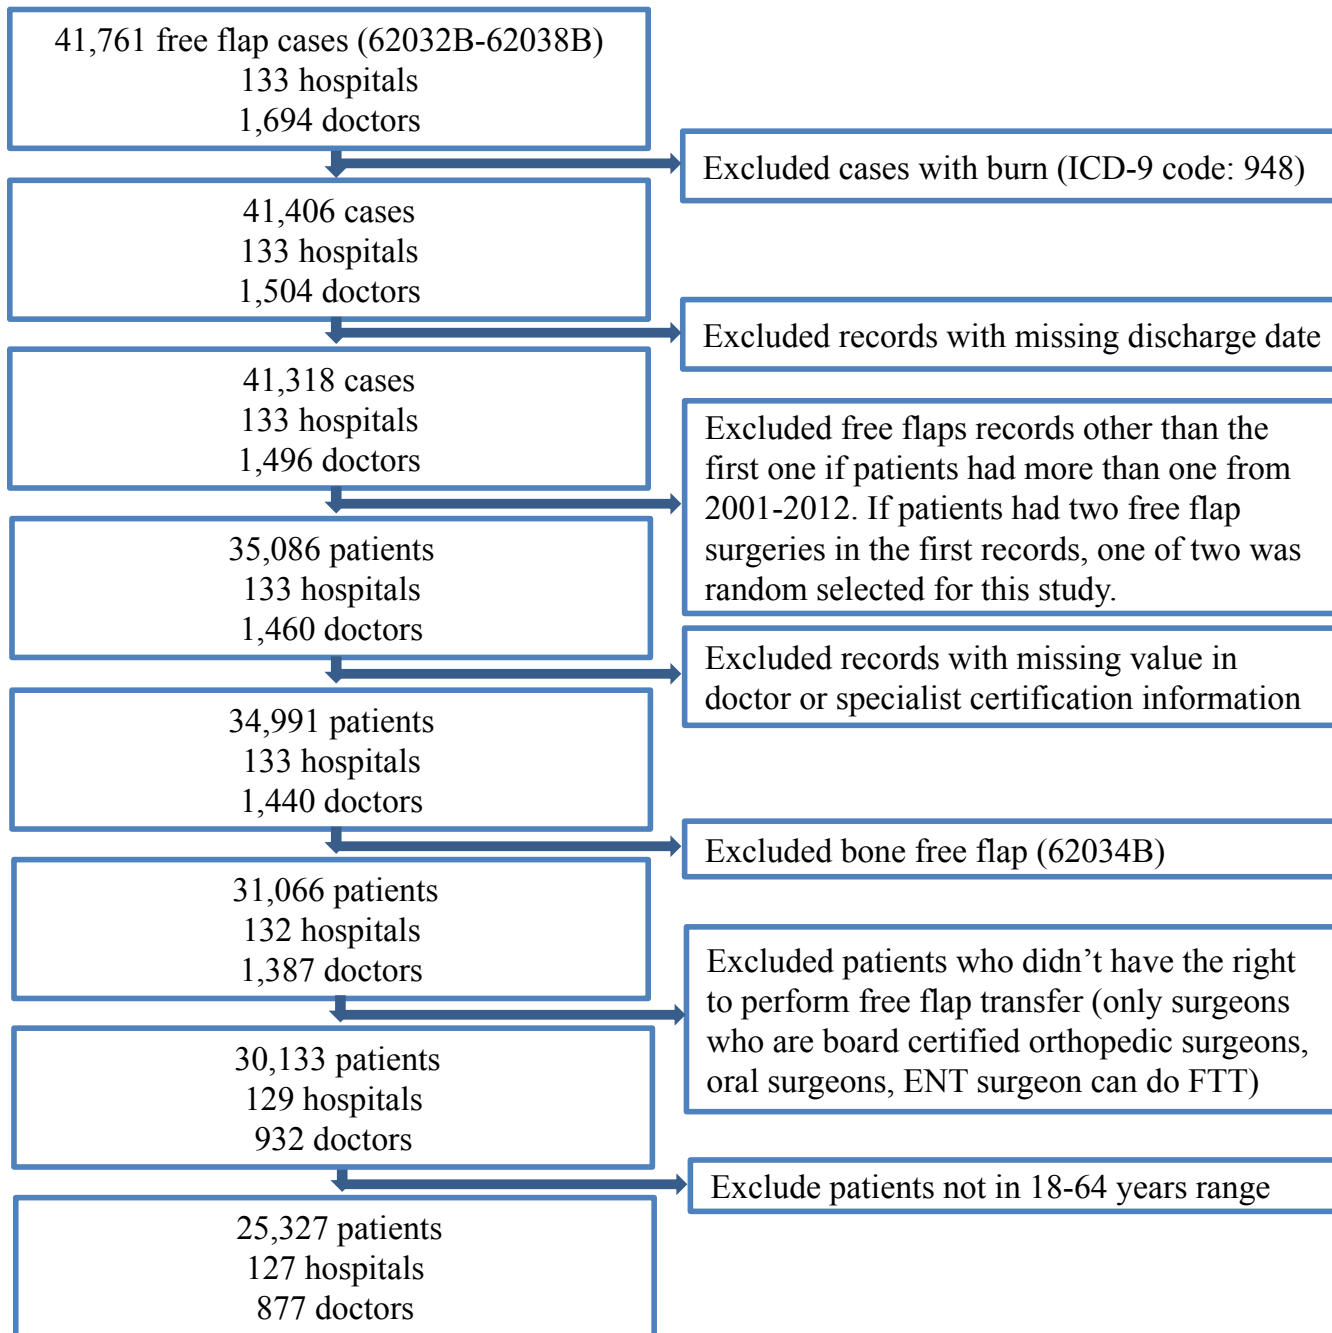

Supplement: NIHMS859132-supplement-Supplemental_Digital_Content_1.pdf [file NIHMS859132-supplement-Supplemental_Digital_Content_1.pdf]
